# Supplementary material
Source: publisher site journal article supplement (https://www.dovepress.com/article/498227)
Supplement: Supplementary file 1 [file get_supplementary_file.php]

**Supplementary file 1.** Search strategy

| Database | Keyword | Retrieved | Date |
| --- | --- | --- | --- |
| PubMed | ("nursing"[MeSH Terms] OR "nursing"[All Fields] OR "nursings"[All Fields] OR "nursing"[MeSH Subheading] OR "nursing s"[All Fields] OR "nursing staff"[All Fields] OR "emergency nurse"[All Fields] OR "ED nurse"[All Fields]) AND "response time"[All Fields] AND ("emergency departement"[All Fields] OR ("education"[MeSH Subheading] OR "education"[All Fields] OR "ed"[All Fields]) OR "emergency room"[All Fields]) | 523 | June 17, 2024 |
| Scopus | ( TITLE-ABS-KEY ( nursing OR "nursing staff" OR "emergency nurse" OR "ED nurse" ) AND TITLE-ABS-KEY ( "response time" ) AND TITLE-ABS-KEY ( "emergency departement" OR ed OR "emergency room" ) ) | 32 | June 17, 2024 |
| EBSCOhost | ((nursing OR "nursing staff" OR "emergency nurse" OR "ED nurse") AND ("response time")) AND ("emergency departement" OR ED OR "emergency room" OR “emergency ward”) | 177 | June 17, 2024 |
| Google scholar | response time DAN waktu tanggap DAN perawat DAN instalasi gawat darurat | 605 | June 17, 2024 |
